# Supplementary material for: Differential Pathogen-Specific Immune Reconstitution in Antiretroviral Therapy-Treated Human Immunodeficiency Virus-Infected Children
Source: PubMed Central journal article supplement (PMC6467189; doi:10.1093/infdis/jiy668), 2019-01-08

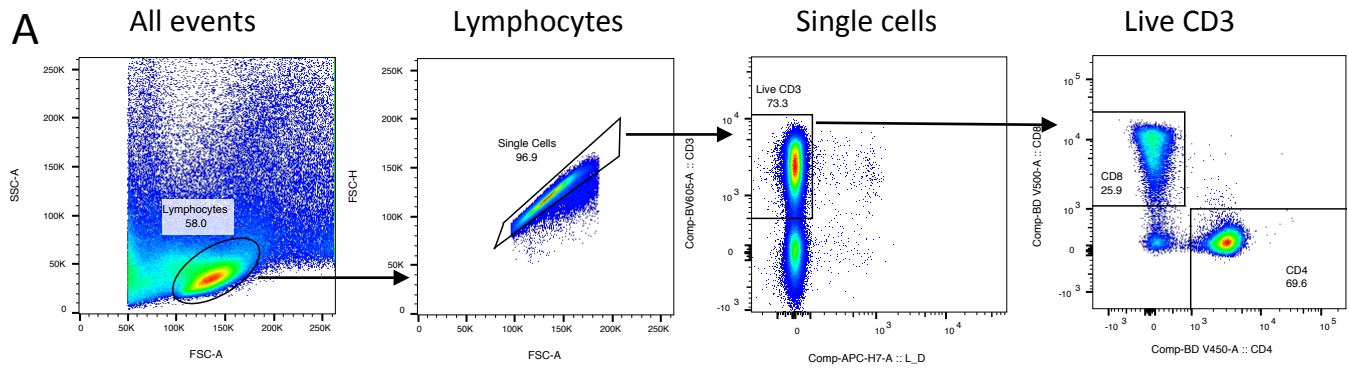

**B** CD4 gating for PD-1 based on FMO control

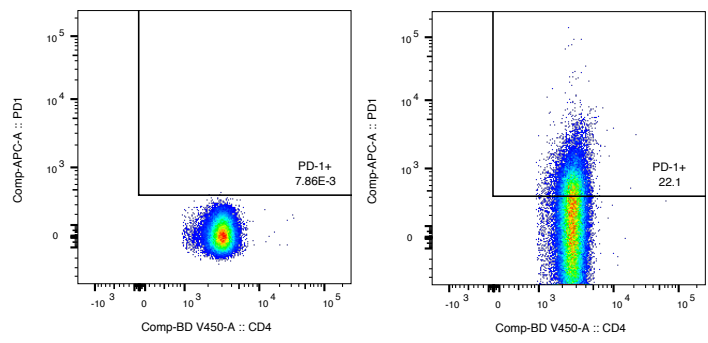

**C** CD4 gating for CD45RA and CCR7

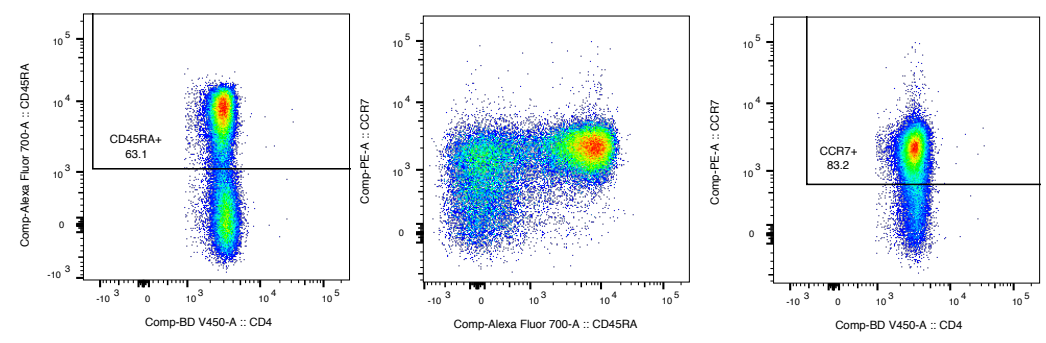

**D** CD4 gating for HLA-DR and CD38

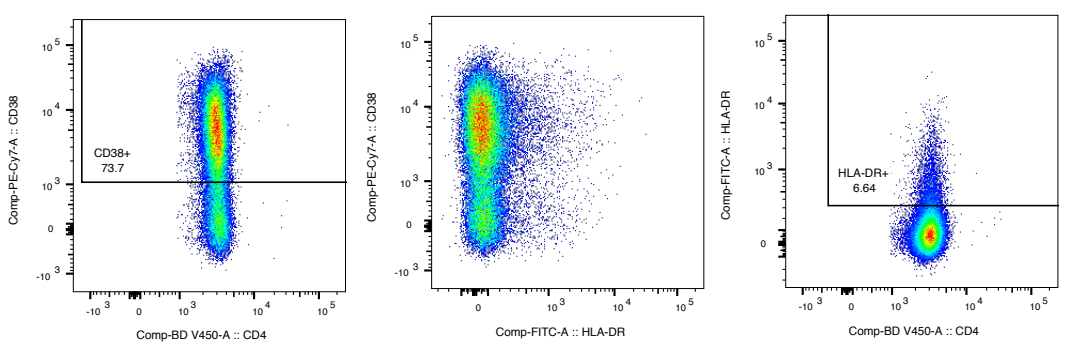

**E** Boolean gating

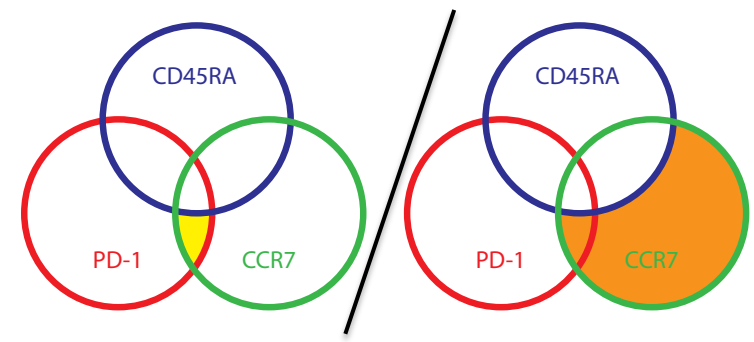

Supplement: jiy668_suppl_supplementary_figure-2.pdf [file jiy668_suppl_supplementary_figure-2.pdf]
