# Supplementary material for: Differential Pathogen-Specific Immune Reconstitution in Antiretroviral Therapy-Treated Human Immunodeficiency Virus-Infected Children
Source: PubMed Central journal article supplement (PMC6467189; doi:10.1093/infdis/jiy668), 2019-01-08

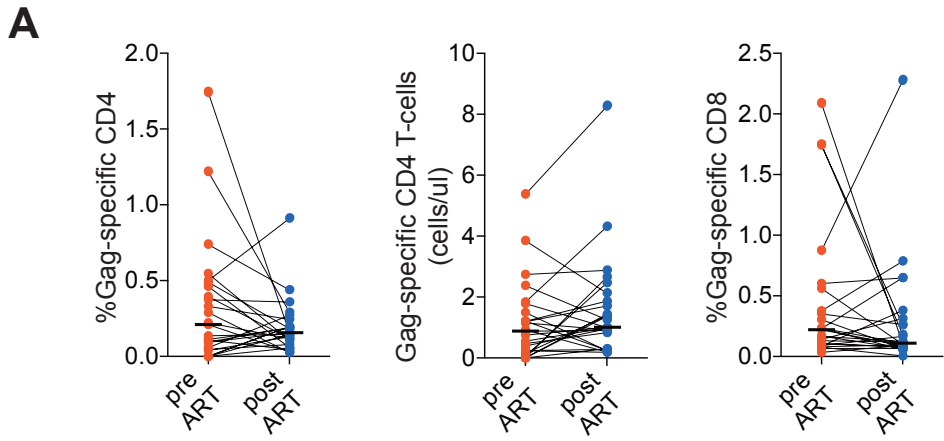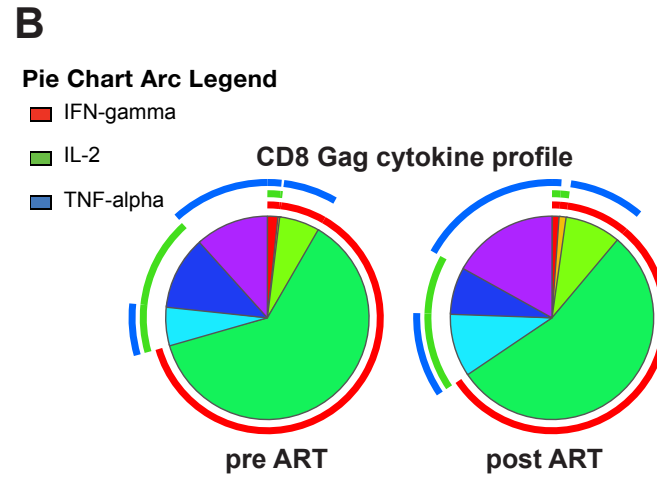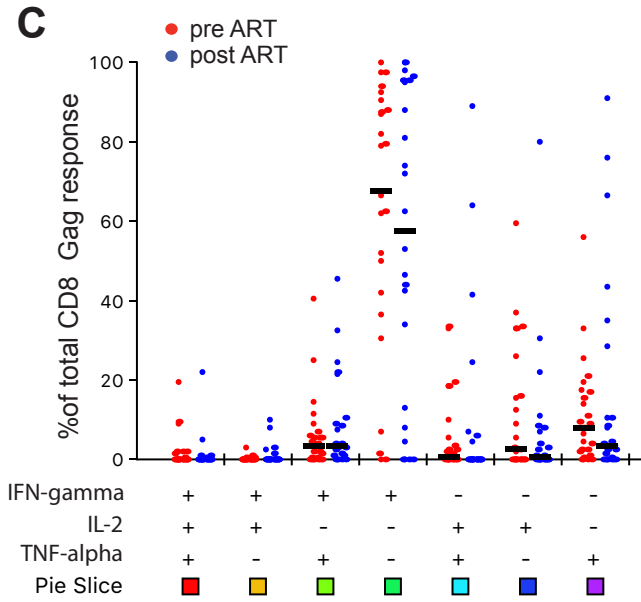

Supplement: jiy668_suppl_supplementary_figure-6.pdf [file jiy668_suppl_supplementary_figure-6.pdf]
