# Supplementary material for: Differential Pathogen-Specific Immune Reconstitution in Antiretroviral Therapy-Treated Human Immunodeficiency Virus-Infected Children
Source: PubMed Central journal article supplement (PMC6467189; doi:10.1093/infdis/jiy668), 2019-01-08

**A****Pie Chart Arc Legend**

- IFN-gamma
- IL-2
- TNF-alpha

**CD8 PPD cytokine profile**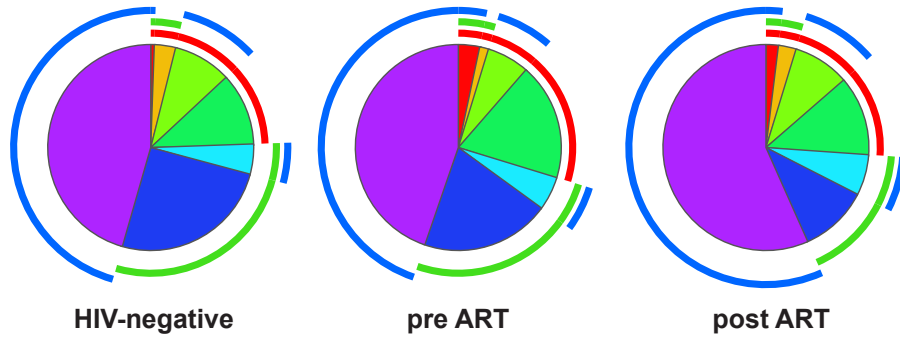**B**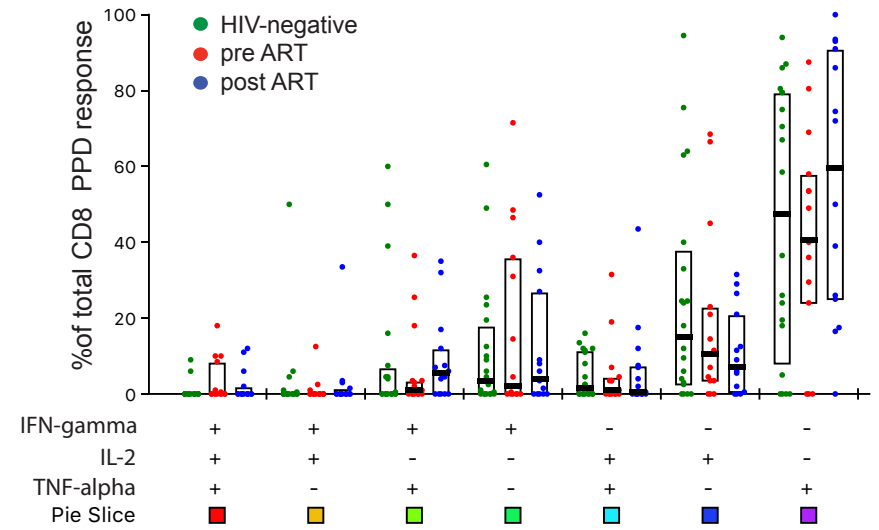**C**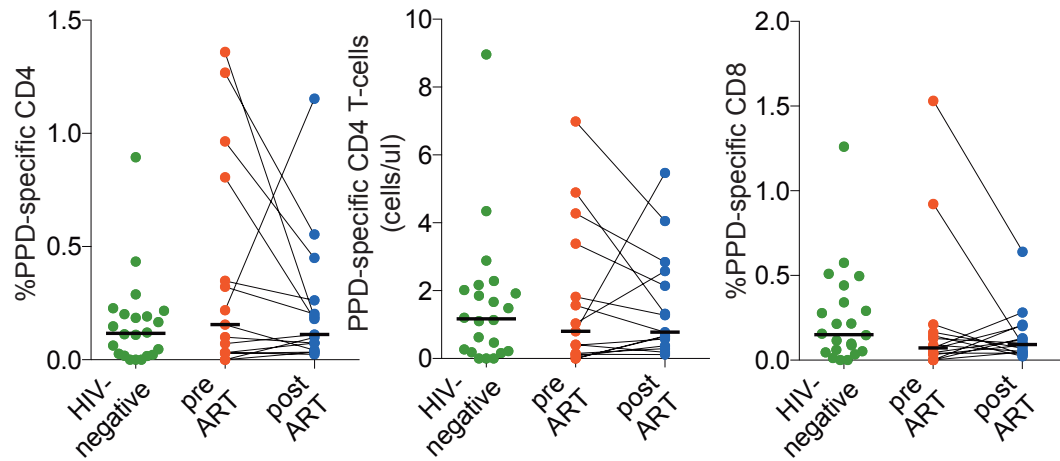**D**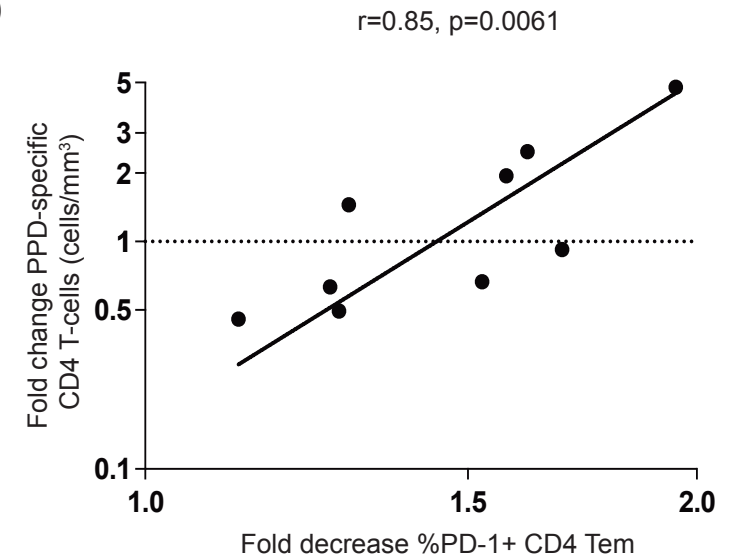

Supplement: jiy668_suppl_supplementary_figure-7.pdf [file jiy668_suppl_supplementary_figure-7.pdf]
