# Supplementary material for: Differential Pathogen-Specific Immune Reconstitution in Antiretroviral Therapy-Treated Human Immunodeficiency Virus-Infected Children
Source: PubMed Central journal article supplement (PMC6467189; doi:10.1093/infdis/jiy668), 2019-01-08
Supplement: jiy668_suppl_supplementary_table-2.pdf [file jiy668_suppl_supplementary_table-2.pdf]

## Clinical characteristics of study participants

| Participant Identification | Sex | ART          | Pre-ART     |                      |        |                        | Post-ART             |       |                        |
|----------------------------|-----|--------------|-------------|----------------------|--------|------------------------|----------------------|-------|------------------------|
|                            |     |              | Age (years) | CD4 count (cells/ul) | CD4%   | Viral load (copies/ml) | CD4 count (cells/ul) | CD4%  | Viral load (copies/ml) |
| 203-33-0004-1              | f   | ABC/3TC/EFV  | 12.9        | 521                  | 31     | 490000                 | 486                  | 34    | <20                    |
| 203-33-0015-1              | f   | ABC/3TC/EFV  | 4.2         | 550                  | 28     | 17000                  | 732                  | 44    | <20                    |
| 203-33-0037-1              | f   | ABC/3TC/EFV  | 9.2         | 360                  | 12     | 7100                   | 696                  | 22    | <20                    |
| 205-33-0001-1              | f   | ABC+3TC+EFV  | 4.2         | 1171                 | 26     | 48500                  | 1849                 | 38    | <20                    |
| 205-33-0012-1              | m   | ABC+3TC+EFV  | 1.4         | 172                  | 11     | 17596                  | 1907                 | 32    | <20                    |
| 205-33-0015-1              | m   | ABC+3TC+EFV  | 7.2         | 35                   | 2      | 25910                  | 692                  | 16.3  | <20                    |
| 205-33-0024-1              | m   | ABC+3TC+EFV  | 3.5         | 138                  | 6      | 946297                 | 943                  | 27    | <20                    |
| 205-33-0027-1              | f   | ABC/3TC/LPVr | 1.9         | 1655                 | 29     | 589931                 | 2185                 | 41.8  | <20                    |
| 205-33-0029-1              | m   | TDF/FTC/EFV  | 7.3         | 60                   | 5      | 6800                   | 161                  | 9     | <20                    |
| 205-33-0030-1              | m   | ABC/3TC/EFV  | 8.8         | 263                  | 17     | 140000                 | 427                  | 28    | <20                    |
| 205-33-0033-1              | m   | ABC/3TC/EFV  | 6.1         | 367                  | 3      | 7800                   | 474                  | 8     | <20                    |
| 205-33-0038-1              | m   | ABC/3TC/EFV  | 4.8         | 1439                 | 28     | 490000                 | 2302                 | 40    | <20                    |
| 205-33-0040-1              | f   | TDF/FTC/EFV  | 15.2        | 235                  | 21     | 52000                  | 507                  | 38    | <20                    |
| 205-33-0051-1              | m   | ABC/3TC/LPVr | 1.4         | 2915                 | 32     | 940                    | 1833                 | 34    | <20                    |
| 205-33-0056-1              | f   | ABC/3TC/EFV  | 7.2         | 1075                 | 30     | 120000                 | 1009                 | 35    | <20                    |
| 205-33-0061-1              | m   | ABC/3TC/EFV  | 11.5        | 251                  | 9      | 540000                 | 511                  | 15    | <20                    |
| 205-33-0062-1              | m   | TDF/FTC/EFV  | 13.7        | 1051                 | 37     | 24000                  | 1057                 | 33    | <20                    |
| 205-33-0065-1              | f   | TDF/FTC/EFV  | 7.9         | 195                  | 11     | 250000                 | 430                  | 19    | <20                    |
| 205-33-0066-2              | f   | TDF/FTC/EFV  | 13.1        | 412                  | 15     | 270000                 | 503                  | 19    | <20                    |
| 205-33-0067-1              | m   | ABC/3TC/EFV  | 7.6         | 516                  | 15     | 890000                 | 880                  | 28    | <20                    |
| 205-33-0067-2              | f   | ABC/3TC/EFV  | 9.5         | 443                  | 18     | 1600000                | 631                  | 29    | <20                    |
| 205-33-0070-1              | f   | ABC/3TC/EFV  | 10.6        | 405                  | 21     | 52000                  | 674                  | 37    | <20                    |
| 205-33-0071-1              | f   | TDF/FTC/EFV  | 7.6         | 14                   | 5      | 150000                 | 180                  | 17    | <20                    |
| 205-33-0073-1              | f   | TDF/FTC/EFV  | 14.9        | 41                   | 3      | 590000                 | 571                  | 22    | <20                    |
| 205-33-0074-1              | f   | TDF/FTC/EFV  | 7           | 397                  | 18     | 48000                  | 777                  | 32    | <20                    |
| Median                     |     |              | 7.6         | 397                  | 17     | 120000                 | 692                  | 29    |                        |
| IQR                        |     |              | 4.5-11.0    | 183-800              | 7.5-28 | 20798-515000           | 494-1033             | 19-36 |                        |
